# Supplementary material
Source: ML conference proceedings conference paper supplement (https://proceedings.mlr.press/v222/tang24a.html)
Supplement: Supplementary file [file tang24a-supp.pdf]

Table 8: Performance comparisons between our methods and baselines with considering amount (Day5 - Day6). The best results are denoted by bold.

| Date          | Day 5       |             |             |             | Day 6       |             |             |             |
|---------------|-------------|-------------|-------------|-------------|-------------|-------------|-------------|-------------|
| Method        | $P_{20000}$ | $A_{20000}$ | $P_{50000}$ | $A_{50000}$ | $P_{20000}$ | $A_{20000}$ | $P_{50000}$ | $A_{50000}$ |
| Cross Entropy | 19.6        | 23.3        | 34.8        | 42.7        | 17.5        | 14.0        | 31.2        | 21.4        |
| Focal Loss    | 16.3        | 20.4        | 30.4        | 40.5        | 15.0        | 14.2        | 23.7        | 19.0        |
| Mixup         | 16.3        | 29.5        | 26.1        | 42.4        | 12.5        | 12.5        | 22.5        | 17.1        |
| CE-DRS        | 0.0         | 0.0         | 1.1         | 0.6         | 0.0         | 0.0         | 0.0         | 0.0         |
| CE-DRW        | 21.7        | 25.5        | 42.4        | 46.2        | 17.5        | 14.2        | 28.7        | 18.8        |
| LDAM          | 20.7        | 39.1        | 28.3        | 51.0        | 23.8        | 16.6        | <b>38.8</b> | <b>36.8</b> |
| LDAM-DRW      | 20.7        | 18.2        | 37.0        | 49.8        | 17.5        | 5.5         | 28.7        | 18.1        |
| CB-CE         | 23.9        | <b>46.1</b> | 27.2        | 48.8        | 17.5        | 14.3        | 35.0        | 23.8        |
| CB-Focal      | 22.8        | 42.5        | 32.6        | 51.9        | 15.0        | 5.6         | 35.0        | 34.8        |
| BBN           | 5.4         | 9.3         | 9.8         | 20.5        | 3.8         | 2.7         | 5.0         | 5.3         |
| BiCo          | <b>35.9</b> | 30.8        | <b>58.7</b> | 48.6        | <b>23.8</b> | <b>18.1</b> | 37.5        | 25.1        |

Table 9: Performance comparisons between our methods and baselines considering amount (Day5 - Day6). The best results are denoted by bold.

| Date            | Day 5       |             |             |             | Day 6       |             |             |             |
|-----------------|-------------|-------------|-------------|-------------|-------------|-------------|-------------|-------------|
| Method          | $P_{20000}$ | $A_{20000}$ | $P_{50000}$ | $A_{50000}$ | $P_{20000}$ | $A_{20000}$ | $P_{50000}$ | $A_{50000}$ |
| Cross Entropy-A | 19.6        | 30.1        | 30.4        | 46.6        | 18.8        | 17.1        | 36.2        | 43.0        |
| Focal Loss-A    | 20.7        | 31.1        | 34.8        | 40.5        | 16.2        | 5.5         | 28.7        | 18.0        |
| Mixup-A         | 16.3        | 29.5        | 26.1        | 42.4        | 17.5        | 6.8         | 36.2        | 36.8        |
| CE-DRS-A        | 0.0         | 0.0         | 1.1         | 0.7         | 0.0         | 0.0         | 0.0         | 0.0         |
| CE-DRW-A        | 25.0        | 41.0        | 41.3        | 51.5        | 17.5        | 13.7        | 30.0        | 21.7        |
| LDAM-A          | 18.5        | 25.9        | 29.3        | 42.2        | 13.8        | 5.9         | 25.0        | 8.6         |
| LDAM-DRW-A      | 18.5        | 23.1        | 28.3        | 35.3        | 17.5        | 13.9        | 22.5        | 15.6        |
| CB-CE-A         | 19.6        | 28.1        | 29.3        | 49.6        | 17.5        | 15.3        | 37.5        | 34.4        |
| CB-Focal-A      | 14.1        | 20.9        | 22.8        | 37.4        | 13.8        | 12.6        | 28.7        | 22.3        |
| BBN-A           | 6.5         | 22.5        | 10.9        | 33.8        | 8.8         | 15.0        | 15.0        | 20.1        |
| BiCo            | 35.9        | 30.8        | 58.7        | 48.6        | 23.8        | 18.1        | 37.5        | 25.1        |
| BiCo-A          | 29.3        | <b>46.7</b> | 40.2        | 54.2        | <b>31.2</b> | <b>50.5</b> | <b>45.0</b> | <b>67.9</b> |
| TriCo           | <b>38.0</b> | 40.1        | <b>64.1</b> | <b>62.6</b> | 23.8        | 17.4        | 37.5        | 31.6        |
